# Supplementary material for: Vitrification of Lepidopteran Embryos—A Simple Protocol to Cryopreserve the Embryos of the Sunflower Moth, Homoeosoma electellum
Source: MDPI journal article supplement (doi:10.3390/insects13100959), 2022-10-20
Supplement: s1 [file s1]

Table S1: Raw data for water content

|        | Time(seconds) | Water Content per 100 embryos in microliters |     |     |     |     |     |     |     |     |
|--------|---------------|----------------------------------------------|-----|-----|-----|-----|-----|-----|-----|-----|
| NT     | NA            | 2.3                                          | 2.1 | 1.9 | 2.2 | 2.3 | 2.2 | 2.3 | 2.1 | 2.2 |
| TE     | 180           | 2.3                                          | 2.2 | 2.2 | 2.2 | 2.4 | 2.1 | 2.5 |     |     |
| TC     | 180           | 2.7                                          | 2.3 | 2   | 2.4 | 2.4 | 2.6 | 2.9 | 2.5 | 2.7 |
| EG10   | 600           | 2.1                                          | 1.8 | 1.9 | 2.4 | 2.1 | 2.1 | 1.9 | 1.9 |     |
| EG37   | 720           | 1.7                                          | 1.9 | 2.3 | 1.6 | 1.7 | 1.8 |     |     |     |
| EG40+T | 720           | 1.2                                          | 1.4 | 1   | 1   | 1.5 | 1.2 | 1.4 |     |     |

Table S2: Means and Standard Deviations for water content and the embryonic supercooling points

|         | Mean Water Content (μl) | Standard Deviation | Replicate count (n) | Mean ± SD Supercooling point (°C) |
|---------|-------------------------|--------------------|---------------------|-----------------------------------|
| NT      | 2.2                     | 0.13               | 9                   | -17.6 ± 4.8                       |
| P80     | 2.3                     | 0.14               | 7                   | -16.3 ± 3.3                       |
| P80+Clx | 2.5                     | 0.26               | 9                   | -18.1 ± 6.1                       |
| EG10    | 2.03                    | 0.19               | 8                   | -18.7 ± 7.0                       |
| EG37    | 1.8                     | 0.25               | 6                   | -16.9 ± 3.4                       |
| EG40+T  | 1.24                    | 0.19               | 7                   | -19.5 ± 2.8                       |

**Abbreviations**

NT – Not treated; P80 – 0.5% Polysorbate 80; P80+Clx – P80 + 10% sodium hypochlorite; EG10 – 1,2-ethanediol (10%); EG37 – 1,2-ethanediol (37%); EG40+T – 40% 1,2-ethanediol in 0.5 molar trehalose; SD – standard deviation of the mean. **Note:** all ethanediol and trehalose based solutions were mixed in Grace's insect cell culture medium.

**Methods in brief:** Tables S1 and S2 depict the same data set in raw and condensed form. The data was obtained by scanning the sunflower moth embryos in a differential scanning microcalorimeter at 1.5°C/min from 4°C to -40°C in a Perkin Elmer DSC7. The water content was derived from the area of integrated freeze exotherms of the embryos. Treated and untreated *Homoeosoma electelum* embryos that were airdried for 30 seconds were placed in a 50 microliter aluminum pan, covered in halocarbon oil (HC-700, Halocarbon corp., SC, USA) and sealed prior to being scanned.
